# Supplementary material for: Defence Responses Associated with Elicitor-Induced, Cultivar-Associated Resistance to Latania Scale in Kiwifruit
Source: MDPI journal article supplement (doi:10.3390/plants11010010), 2021-12-21
Supplement: s1 [file s1]

**Protocol S1. Extraction of leaf samples for liquid chromatography/mass spectrophotometry (LC/MS) in 2016.**

For each sample, 100 mg frozen ground tissue (FW) was weighed into a 2-mL Eppendorf tube on dry ice and extracted with 1 mL of chilled (4°C) 80:20 acetonitrile:water to which internal standards had been added (2.5 ng [ $^2\text{H}_4$ ] SA, 12.5 ng [ $^2\text{H}_5$ ] JA, and 6.25 ng [ $^2\text{H}_6$ ] ABA). The samples were shaken for 30 min at 4°C on a flat-bed orbital shaker, extracted overnight at -20°C and then centrifuged at 13,000 g for 10 min at 4°C. An 800- $\mu\text{L}$  aliquot of each sample was transferred to a 96-well deep plate and evaporated to dryness in a refrigerated CentriVap vacuum concentrator at -4°C (Labconco, Kansas City, MO, USA). Samples were reconstituted in 200  $\mu\text{L}$  of chilled (4°C) 80:20 acetonitrile:water and then made basic with the addition of 1.8 mL of 0.67% ammonium hydroxide (aq) prior to SPE clean-up on a SOLA SAX 96-well plate (10 mg/2 mL; Thermo Scientific, CA, USA). Plates were activated using 2x 1.5 mL acetonitrile and equilibrated using 2x 1.5 mL 0.67% ammonium hydroxide (aq). After equilibration, samples were loaded and washed with 1.5 mL of 0.67% ammonium hydroxide (aq) followed by 1.3 mL of methanol. Acidic plant hormones were eluted with 600  $\mu\text{L}$  3.77% formic acid in acetonitrile and evaporated to dryness in a refrigerated centrivap vacuum concentrator at -4°C. Samples were reconstituted in 200  $\mu\text{L}$  of 10:90 acetonitrile:water for analysis by LC/MS.

**Protocol S2. Extraction of leaf samples for LC/MS in 2018.**

The samples, 100 mg frozen ground tissue (FW), were weighed into 1.5-mL Eppendorf tubes on dry ice, and to each was added 1 mL chilled (4°C) extraction solvent (acetonitrile + 0.01% TFA), labelled internal standard mix (2.5 ng [ $^2\text{H}_4$ ] SA, 25 ng [ $^2\text{H}_5$ ] JA, 6.4 ng [ $^2\text{H}_6$ ] ABA, 0.6 ng [ $^2\text{H}_{10}$ ] JA-ile (2018 season only)) and 0.8 g stainless steel beads 0.9–2 mm (Next Advance Inc., NY, USA). Samples were worked up as described in Bulley et al. [1] and reconstituted in 200  $\mu\text{L}$  of 10:90 acetonitrile:water for analysis by LC/MS.

**Table S1.** Compounds used in liquid chromatography/mass spectrophotometry (LC/MS)

| Compound Name                                            | Abbreviation                            | Source                                                                                                      |
|----------------------------------------------------------|-----------------------------------------|-------------------------------------------------------------------------------------------------------------|
| Radio-labelled salicylic acid O- $\beta$ -glucoside      | [ <sup>2</sup> H <sub>4</sub> ] SAG     | synthesised utilising [ <sup>2</sup> H <sub>4</sub> ] <sup>1</sup> MeSA in place of MeSA [2]                |
| Salicylic acid O- $\beta$ -glucoside                     | SAG                                     | synthesised using published methodology [2] <sup>2</sup>                                                    |
| 12-hydroxy jasmonic acid                                 | 12-OH-JA                                | Ol-chemim Ltd (Olomouc, Czech Republic)                                                                     |
| Radio-labelled salicylic acid                            | [ <sup>2</sup> H <sub>4</sub> ] SA      | CDN Isotopes (Pointe-Claire, Quebec, Canada)                                                                |
| Salicylic acid                                           | SA                                      | Sigma Aldrich (Auckland, New Zealand)                                                                       |
| Radio-labelled abscisic acid                             | [ <sup>2</sup> H <sub>6</sub> ] ABA     | Toronto Research Chemicals (Toronto, Ontario, Canada)                                                       |
| Absciscic acid                                           | ABA                                     | Sigma Aldrich (Auckland, New Zealand)                                                                       |
| Radio-labelled jasmonic acid                             | [ <sup>2</sup> H <sub>5</sub> ] JA      | CDN Isotopes (Pointe-Claire, Quebec, Canada)                                                                |
| Jasmonic acid                                            | JA                                      | Sigma Aldrich (Auckland, New Zealand)                                                                       |
| 9,10-dihydrojasmonic acid                                | DH-JA                                   | Ol-chemim Ltd (Olomouc, Czech Republic)                                                                     |
| Radio-labelled jasmonoyl-isoleucine                      | [ <sup>2</sup> H <sub>10</sub> ] JA-Ile | synthesised utilising [ <sup>2</sup> H <sub>10</sub> ] L-isoleucine in place of isoleucine [3] <sup>1</sup> |
| Jasmonoyl-isoleucine                                     | JA-Ile                                  | Ol-chemim Ltd (Olomouc, Czech Republic)                                                                     |
| (+/-)-4-(3-oxo-2-(pent-2-enyl)cyclopentyl) butanoic acid | OPC-4                                   | Ol-chemim Ltd (Olomouc, Czech Republic)                                                                     |
| cis-(+)-12-oxo-phytodienoic acid                         | cis-OPDA                                | Ol-chemim Ltd (Olomouc, Czech Republic)                                                                     |

<sup>1</sup>>99% pure by LC/MS.<sup>2</sup>>99% pure by <sup>1</sup>H- and <sup>13</sup>C-NMR.

**Table S2.** Multiple reaction monitoring (MRM) transitions used for plant hormone analysis. Optimised Q1 (precursor ion) and Q3 (product ion) transitions, retention time (RT), declustering potential (DP), entrance potential (EP), collision energy (CE) and collision cell exit potential (CXP) for each of the phytohormones analyzed. The internal standard (IS) used for quantitation for each phytohormone is also given. SAG = salicylic acid O- $\beta$ -glucoside; 12-OH-JA = 12-hydroxy jasmonic acid; SA = salicylic acid; ABA = abscisic acid; JA = jasmonic acid; DH-JA = 9,10-dihydrojasmonic acid; JA-Ile = jasmonoyl-isoleucine; OPC-4 = (+/-)-4-(3-oxo-2-(pent-2-enyl)cyclopentyl) butanoic acid; and cis-OPDA = cis-(+)-12-oxo-phytodienoic acid.

| Compound                                | Q1     | Q3     | RT (min) | DP   | EP    | CE    | CXP   | IS                                      |
|-----------------------------------------|--------|--------|----------|------|-------|-------|-------|-----------------------------------------|
| [ <sup>2</sup> H <sub>4</sub> ] SAG     | 303.00 | 96.90  | 4.53     | -50  | -10.0 | -56.2 | -8.6  | -                                       |
| SAG                                     | 299.30 | 136.80 | 4.54     | -60  | -10.0 | -20.0 | -12.0 | [ <sup>2</sup> H <sub>4</sub> ] SAG     |
| 12-OH-JA                                | 225.10 | 58.90  | 4.78     | -60  | -10.0 | -20.0 | -7.9  | [ <sup>2</sup> H <sub>5</sub> ] JA      |
| [ <sup>2</sup> H <sub>4</sub> ] SA      | 141.10 | 97.00  | 4.98     | -40  | -7.8  | -40.0 | -9.6  | -                                       |
| SA                                      | 136.90 | 93.00  | 4.99     | -40  | -11.0 | -25.0 | -7.0  | [ <sup>2</sup> H <sub>4</sub> ] SA      |
| [ <sup>2</sup> H <sub>6</sub> ] ABA     | 269.00 | 159.00 | 5.28     | -25  | -10.0 | -17.0 | -15.0 | -                                       |
| ABA                                     | 263.10 | 153.00 | 5.28     | -60  | -5.0  | -15.0 | -8.0  | [ <sup>2</sup> H <sub>6</sub> ] ABA     |
| [ <sup>2</sup> H <sub>5</sub> ] JA      | 214.00 | 62.10  | 5.51     | -60  | -6.0  | -24.0 | -8.6  | [ <sup>2</sup> H <sub>5</sub> ] JA      |
| JA                                      | 209.10 | 59.10  | 5.52     | -60  | -6.0  | -24.0 | -8.6  | [ <sup>2</sup> H <sub>5</sub> ] JA      |
| DH-JA                                   | 211.00 | 59.00  | 5.71     | -100 | -2.9  | -20.0 | -5.0  | [ <sup>2</sup> H <sub>5</sub> ] JA      |
| [ <sup>2</sup> H <sub>10</sub> ] JA-Ile | 332.20 | 139.90 | 5.83     | -60  | -10.0 | -26.9 | -12.0 | -                                       |
| JA-Ile                                  | 321.90 | 129.80 | 5.84     | -25  | -10.0 | -32.0 | -15.0 | [ <sup>2</sup> H <sub>10</sub> ] JA-Ile |
| OPC-4                                   | 237.20 | 58.80  | 5.84     | -25  | -10.0 | -23.0 | -15.0 | [ <sup>2</sup> H <sub>5</sub> ] JA      |
| cis-OPDA                                | 291.00 | 165.00 | 6.40     | -48  | -10.0 | -26.0 | -3.0  | [ <sup>2</sup> H <sub>5</sub> ] JA      |

**Table S3.** Identification of reference genes (RGs) and genes of interest (GoI) and their primer sequences used for 'Hort16A' and 'Hayward' kiwifruit leaf defence gene expression analysis by quantitative polymerase chain reaction in 2016 and 2018.

| Gene name (Gene ID used in Figures).                     | RG or GoI | Identification (NCBI entry <sup>1</sup> /Acc # <sup>2</sup> /Achn number <sup>3</sup> ) | Forward primer (5'-3')     | Reverse primer (5'-3') |
|----------------------------------------------------------|-----------|-----------------------------------------------------------------------------------------|----------------------------|------------------------|
| <i>40s ribosomal protein</i>                             | RG        | FG498176/Acc23370.1                                                                     | GCAAAGGGATGTGAGGTGA<br>T   | CCCCCTGTCTCAGAAGAACA   |
| <i>Glyceraldehyde 3-phosphate dehydrogenase (GAPDH)</i>  | RG        | FG499278/Acc18050.1                                                                     | GCAGTCAACGATCCCCTTCAT      | GACGCCGAAAACGTGTGACTT  |
| <i>Protein phosphatase 2A (PP2A)</i>                     | RG        | FG522516/Acc33246.1                                                                     | GCAGCACATAATTCCACAG<br>G   | TTTCTGAGCCCATAACAGGAG  |
| <i>Actin</i>                                             | RG        | EF063572/Acc05529.1                                                                     | CACCCTGTGCTGCTTACAGA       | GAGAGAGAACGGCCTGAATG   |
| <b><u>SA associated genes</u></b>                        |           |                                                                                         |                            |                        |
| <i>Pathogenesis-related protein family 1 (PR1)</i>       | GoI       | FG499230/Acc06864.1                                                                     | GCCCCCGGTAAGGTTTGT         | CGAACCAAGACCCACTATTGC  |
| <i>Glucan endo-1,3-β-glucosidase (β-1,3-glucosidase)</i> | GoI       | FG455092/Acc03929.1                                                                     | TTGGTTCAACATGTCAAAGG<br>AG | TAGGCTGCTTGTGGGAAAG    |
| <i>Pathogenesis-related protein family 5 (PR5)</i>       | GoI       | AJ871175/Acc28854.1                                                                     | CGATGGAATTTAGCCCTACG       | ATTTCGGAGTTGCAACAGT    |
| <i>NPR1</i>                                              | GoI       | Acc00932.1                                                                              | AGTTCCCATTTGTCCGTCAT<br>C  | AAGAAACGCTTCCCCAATTC   |
| <b><u>JA associated genes</u></b>                        |           |                                                                                         |                            |                        |
| <i>Lipoxygenase (LOX2)</i>                               | GoI       | Acc32487.1/Achn1236.21                                                                  | CAGAGCTTGATCCCAAGAC<br>A   | CAGGATGGCTCCAATTTTAC   |
| <i>APETALA2 Ethylene responsive factor 2 (AP2 ERF2)</i>  | GoI       | Acc20680.1/Achn033.321                                                                  | ATGAGTCCAATGGCCAAAA<br>C   | GATTTCTGCCGCATATTTCC   |
| <i>Jasmonoyl-L-amino acid synthetase (JAR1)</i>          | GoI       | Acc09200.1                                                                              | TTCTACATTTGCCCACAGCA       | TTTGGCTTGAGCAGTTTGA    |
| <b><u>ABA associated genes</u></b>                       |           |                                                                                         |                            |                        |
| <i>Response to desiccation 22 (RD22)</i>                 | GoI       | Acc29141.1                                                                              | GACCTCAAAAAGGGCACAA<br>A   | AGTCGGGCTTCACAGAAAAG   |



**Table S4.** Identification of reference genes (RGs) and genes of interest (GoI) and their primer sequences used defence gene expression analysis by nCounter™ PlexSet™ NanoString on ‘Hort16A’ and ‘Hayward’ kiwifruit (*Actinidia chinensis*) leaf tissue in 2018.

| Gene name<br>(Gene ID used in<br>Figures)                            | RG or<br>GoI | Identification<br>(NCBI entry <sup>1</sup> /Acc<br># <sup>2</sup> /Achn number <sup>3</sup> ) | Primer A                                                                                                                 | Primer B                                                                                        |
|----------------------------------------------------------------------|--------------|-----------------------------------------------------------------------------------------------|--------------------------------------------------------------------------------------------------------------------------|-------------------------------------------------------------------------------------------------|
| <i>40s ribosomal<br/>protein</i>                                     | RG           | FG498176/<br>Acc23370.1                                                                       | AAACGCCATAGCAGGCCCTGCG<br>AACAGCGAGGCCACCAAGGAGCCTCACTAACAATCACCTCACATC<br>TCATCCTCTTCTTTTCTTGGTGT                       | CGAAAGCCATGACCTCCGATCA<br>AATCTCA                                                               |
| <i>Glyceraldehyde 3-<br/>phosphate<br/>dehydrogenase<br/>(GAPDH)</i> | RG           | FG499278/<br>Acc18050.1                                                                       | AATCCGAGCCTTGGCATCAAAG<br>ATGCTCGATCTGCTGTACCAAC<br>AAAGTCTGTTGAGATTATTGAGCCACCAGTTTCACGAACAAGTCGT<br>TTCATCATGACCAGAAG  | CGAAAGCCATGACCTCCGATCA<br>CTCCACTCGTTGTCATACCAAGA<br>TCAAAGC                                    |
| <i>Protein phosphatase<br/>2A (PP2A)</i>                             | RG           | FG522516/<br>Acc33246.1                                                                       | TAATCATGTCCAATACCTGTGGA<br>ATTATGTGCTGCATTGCCATTTC<br>TGGACAAAGACGCCTATCTTCCA<br>GTTTGATCGGGAAACT                        | CGAAAGCCATGACCTCCGATCA<br>CTCAAGAGAGATCGAGTGTAGT<br>ATGGTCATACGGTACAGATAAT<br>GTGGGTTGC         |
| <i>Actin</i>                                                         | RG           | EF063572/<br>Acc05529.1                                                                       | GTTGAACCACCACTGAGCACA<br>TGTTGCCATATAGATCTTTCTG<br>ATATCCGAACCTAACTCCTCGCT<br>ACATTCTATTGTTTTT                           | CGAAAGCCATGACCTCCGATCA<br>CTCCAAGAGCAGTAATTTCTTA<br>CTCATGCGGTCTGCGATACCAGG<br>GAACATA          |
| <i>Elongation<br/>Factor (EF)</i>                                    | RG           | FG526520/<br>Acc31629.1                                                                       | TTCCCCAACTTTAATCGTCCCTTGT<br>TCAACACGACCAGTGGCAACAGTT<br>CCCTCAAGACCTAAGCGACAGCGT<br>GACCTTGTTTCA                        | CGAAAGCCATGACCTCCGATCACT<br>CACCAGTAGATTTTCATGGGAGCACC<br>CTGCATCAGCCCTAAATCTCAAC<br>ATC        |
| <b><u>SA associated<br/>genes</u></b>                                |              |                                                                                               |                                                                                                                          |                                                                                                 |
| <i>Pathogenesis-<br/>related protein<br/>family 1 (PR1)</i>          | GoI          | FG499230/<br>Acc06864.1                                                                       | CTTCTCTGCAACCCATAGGTTCA<br>CTGCAGCGGTGCCAGTAAAAGA<br>TCCACCCAATTTGGTTTTACTCCCACAAGAGTTAGAGTTGATATCAT<br>CTCGATTATGCGGAGT | CGAAAGCCATGACCTCCGATCA<br>CTCTGCAAGCATTCTCCCCCGAC<br>AGTTCGG                                    |
| <i>Glucan endo-1,3-β-<br/>glucosidase (β-1,3-<br/>glucosidase)</i>   | GoI          | FG455092/<br>Acc03929.1                                                                       | ACATACTCTATTTTTTGCTAGTGC<br>CCTCTTTATGAGGGAAATCACAA<br>GCACAACAGCCACTTTTTTCCA<br>AATTTTGCAAGAGCC                         | CGAAAGCCATGACCTCCGATCA<br>CTCTATTCTTTTATTAGATATTTT<br>GTCTGTCTTCATAGGAGCAATCT<br>CTCGGT         |
| <i>Pathogenesis-<br/>related protein<br/>family 5 (PR5)</i>          | GoI          | AJ871175/<br>Acc28854.1                                                                       | CCTGGAACGGCAGCGGCCCAAA<br>CGGTGAAAGGGCAGTTGTTTATG<br>ATATTCTTGAGTTTATGTATTG<br>CCAACGAGTTTGTCTTT                         | CGAAAGCCATGACCTCCGATCA<br>CTCCAGGATTGATGATCCAATTC<br>TGGCCACGGTCAAGGCGTTTGCC<br>ACCA            |
| WRKY33                                                               | GoI          | FG468929                                                                                      | CGAAAGCCATGACCTCCGATCA<br>CTCAGATTTCTGTGGAGAAGCTT<br>TGAATGGGTGCAAATTCTGATTT<br>CCCTCCA                                  | GGGTAAACGACGAGAATTGAG<br>TTTCTCTGATGGTTTGTTCATGT<br>TCCACACCGTGTGGACGGCAAC<br>TCAGAGATAACGCATAT |
| WRKY75                                                               | GoI          | FG474406                                                                                      | TCCAATTGAGAAGTCCACAGAC<br>AACTTTGAGCACATCTTGACTCA<br>GATGCCCTGGAGTTTATGTATTG<br>CCAACGAGTTTGTCTTT                        | CGAAAGCCATGACCTCCGATCA<br>CTCCCTAAAGATGAAGGAGTGG<br>TGGTGACAACTTATGAAGGCAT<br>GCACTCCCA         |

|                                                                       |     |                                        |                                                                                                                                                                                  |
|-----------------------------------------------------------------------|-----|----------------------------------------|----------------------------------------------------------------------------------------------------------------------------------------------------------------------------------|
| <i>Glutathione S-transferase (Glut-S-transferase)</i>                 | GoI | FG460267                               | ATCGATCTTGTTTCAGCTCTTCAA CGAAAGCCATGACCTCCGATCA<br>TCCATGCTGCTAGTTTAGGCCGC CTCCTGTATTGTTTGACCAATGC<br>AGATAAGGTTGTTATTGTGGAGG TTCAGGGTCGCATTTTGTCTGCG<br>ATGTTACTACA TGTAAGC     |
| <i>Hypersensitive response/ salicylic acid signalling (HS SA sig)</i> | GoI | FG431814                               | ACATATACTGCATAGTTTCTCTA CGAAAGCCATGACCTCCGATCA<br>GCGGTTTCATCTCCAGCTTCTGCC CTCTACGGGTAGGTGAGAAGGT<br>TGAGGCTGTAAAGCTGTAGCA TTACCAATGACAAGTTCACTGCC<br>ACTCTTCCACGA TCCCTTTC      |
| <i>Pathogenesis-related protein family 2 (PR2 Primer3)</i>            | GoI | FG480859                               | TCAAACATGGCAAACACATAAG CGAAAGCCATGACCTCCGATCA<br>TTTCTATCGGTCCACCGGACCTT CTCGGAGAAAGAGACCCCAATG<br>CTAGGCTAGGACGCAAATCACT CTTCTCAAATTCTGGGTCTTTTTG<br>TGAAGAAGTGAAAGCGAG ATTCTCA |
| <i>Pathogenesis-related protein family 5 (PR5 PrimerF)</i>            | GoI | FG417283/<br>Acc28852.1                | ATTGCCCGTGATATTGACAGAGT CGAAAGCCATGACCTCCGATCA<br>ACGATATTGGCTGACACTTGCCT CTCAAAACCGTGACAGGTTATT<br>GACACCACGCGATGACGTTCTG GCATTGCCTGGGTTTGTAACGGG<br>CAAGAGTCGCATAATCT TTTGGGC  |
| <i>Endochitinase (Endochit PrimerG)</i>                               | GoI | FG512537/<br>Acc24397.1                | AAAAGCATCATAGGTATAAAAT CGAAAGCCATGACCTCCGATCA<br>CCCTTCCCCTCGCAAGCGGCATC CTCGCAGCATCACCGGTGTTTCC<br>GTTCCCATTTGGAATGATGTGTA AAAAGCCCCAAAAGACTTAGCA<br>CTGGAATAAGACGACG GCAGAAAC  |
| <b><u>IA associated genes</u></b>                                     |     |                                        |                                                                                                                                                                                  |
| <i>Cytochrome oxidase subunit 1 (COI1)</i>                            | GoI | FG460354                               | CGTTGTCTTGCTCACTTTTCTGTC CGAAAGCCATGACCTCCGATCA<br>TTCTTCATAAGATCTGAACCGC CTCTAGTCAATCACGCGCTGGAA<br>AAACTTCCTTCTGTGTTCCAGC CACCAAATCCGGCATTCCGTTTC<br>TACAAACTTAGAAAC CATCACT   |
| <i>Lipoxygenase (LOX2)</i>                                            | GoI | Acc32487.1/<br>Achn123621              | TCTTCTCAGAATCATCAGACTTG CGAAAGCCATGACCTCCGATCA<br>GAAGCAACCCAAGAGTTGCAAT CTCCTCTCTTAGCCTCTTTAACCC<br>TCACACATAAAATTGGTTTTGCC ATTTGGTGTCTTGTTGGTGAAGA<br>TTTCAGCAATTCAACTT AAACTC |
| <i>Plant defensin gene 1.2 (PDF1.2)</i>                               | GoI | Acc11160.1                             | TCTCGTCCGGCGCTGGCATAAC CGAAAGCCATGACCTCCGATCA<br>TTTGCTGTTGCGAATTCAGAGTT CTCACTGTCTGTGCGAGTTATCA<br>AGCTCTTTCGTTGGGACGCTTGA GTCGAGCCACAGGGCCCGGACC<br>AGCGCAAGTAGAAAAC ATG       |
| <b><u>Phenyl propanoid pathway genes</u></b>                          |     |                                        |                                                                                                                                                                                  |
| <i>Phenylalanine ammonia lyase (PAL)</i>                              | GoI | FG484623/<br>Acc32206.1<br>/Achn060261 | CATCTTAGTCGATGAGCGGATGA CGAAAGCCATGACCTCCGATCA<br>CTTCGATTAGCGGGCCCAACCACCTCGAGACATCGATCAATGGATT<br>TGGGCTGGTCAAGACTTGCATGA ATCGTTACCGAGTTGATCTCCC<br>GGACCCGCAAATTCT GTTCGAT    |
| <i>Chalcone synthase (CHS)</i>                                        | GoI | FG528287                               | AAGAGAGAGTTCCAGTCTGAGA CGAAAGCCATGACCTCCGATCA<br>TGCCCAAGGGCTTGAAAGCCTCT CTCTCAGTTCGACTTGGTCTAAA<br>ACTAGCCAGCAGACCTGCAATA ATAACAGGCCACCAGGGTGAG<br>TCAAAGTTATAAGCGCGT CGATCCAA  |
| <i>4-Coumarate-coenzyme A ligase (4CL)</i>                            | GoI | FG515208                               | AACTTCACCAGCAACTTCATCTT CGAAAGCCATGACCTCCGATCA<br>TTTGCGGGACAACAGCAGCGTC CTCGCTTCTTCTGTAAGTTCAAA<br>GGCAACCTGCCAATGCACTCGA CCCATTGACCGAACCACAAAT<br>TCTTGTCATTTTTTTGCG GCTACAGG  |

|                                             |     |          |                                                                                                                                                                                   |
|---------------------------------------------|-----|----------|-----------------------------------------------------------------------------------------------------------------------------------------------------------------------------------|
| Cinnamoyl-<br>coenzyme A<br>reductase (CCR) | GoI | FG397115 | TCCAGCAGATCTACCTTGAAGAG CGAAAGCCATGACCTCCGATCAC<br>TTTCAGATTCTCGGATGCTTTATC TCCATGGAACACTCCGTCGCATC<br>AAGCAAACCTGGAGAGAGAAGTG CTGATATGGGTGCAGAAAGAGA<br>AAGACGATTTAACCCA ATGGTAA |
|---------------------------------------------|-----|----------|-----------------------------------------------------------------------------------------------------------------------------------------------------------------------------------|

### Defence hub

#### gene

|                                  |     |          |                                                                                                                                                                                |
|----------------------------------|-----|----------|--------------------------------------------------------------------------------------------------------------------------------------------------------------------------------|
| TCP14 hub protein<br>(TCP14 hub) | GoI | FG496474 | GACCGTCGCTTCCGTCCATGATC CGAAAGCCATGACCTCCGATCAC<br>ACATGAGAAATACTCTCTCTCTCT TCCTTCCTCTTTCTTCTCGAGCAG<br>CTCCGATTGCTGCATTCCGCTCAA TTGGAATGGGAAATTCGGGCGGT<br>CGCTTGAGGAAGTA GCA |
|----------------------------------|-----|----------|--------------------------------------------------------------------------------------------------------------------------------------------------------------------------------|

<sup>1</sup>NCBI = National Centre for Biotechnology Information

<sup>2</sup>Acc. numbers come from the manual annotation of the Red5 kiwifruit whole Genome Shotgun project

[4] that has been deposited at DDBJ/ENA/GenBank

<sup>3</sup>Achn numbers identify *A. chinensis* var. *chinensis* 'Hongyang' genome sequences from the project described by Huang et al. [5]. The sequences are found at <http://bioinfo.bti.cornell.edu/cgi-bin/kiwi/home.cgi>.

### References

1. Bulley, S.M.; Cooney, J.M.; Laing, W. Elevating ascorbate in *Arabidopsis* stimulates the production of abscisic acid, phseic acid, and to a lesser extent auxin (IAA) and jasmonares, resulting in increased expression of DHAR1 and multiple transcription factors associated with abiotic stress tolerance. *International Journal of Molecular Sciences* **2021**, *22*, 6743, doi:<https://doi.org/10.3990/ijms22136743>.
2. Gryniewicz, G.; Achmatowicz, O.; Hennig, J.; Indulski, J.; Klessig, D.F. Synthesis and characterization of the salicylic-acid beta-d-glucopyranoside. *Pol. J. Chem.* **1993**, *67*, 1251-1254.
3. Kramell, R.; Schmidt, J.; Schneider, G.; Sembdner, G.; Schreiber, K. Synthesis of n-(jasmonoyl)amino acid conjugates. *Tetrahedron* **1988**, *44*, 5791-5807, doi:10.1016/s0040-4020(01)81437-x.
4. Pilkington, S.M.; Crowhurst, R.; Hilario, E.; Nardoza, S.; Fraser, L.; Peng, Y.Y.; Gunaseelan, K.; Simpson, R.; Tahir, J.; Deroles, S.C., et al. A manually annotated *Actinidia chinensis* var. *chinensis* (kiwifruit) genome highlights the challenges associated with draft genomes and gene prediction in plants. *BMC Genomics* **2018**, *19*, 19, doi:10.1186/s12864-018-4656-3.
5. Huang, S.X.; Ding, J.; Deng, D.J.; Tang, W.; Sun, H.H.; Liu, D.Y.; Zhang, L.; Niu, X.L.; Zhang, X.; Meng, M., et al. Draft genome of the kiwifruit *Actinidia chinensis*. *Nature Communications* **2013**, *4*, 9, doi:10.1038/ncomms3640.
